# Supplementary material for: Transient HCO/HCOO− species formation during Fischer–Tropsch over an Fe–Co spinel using low Ribblet ratio syngas: a combined operando IR and kinetic study
Source: Royal Society of Chemistry journal article supplement (doi:10.1039/d2se01282k), 2022-12-03
Supplement: d2se01282k1.pdf [file d2se01282k1.pdf]

# Transient HCO/HCOO<sup>-</sup> species formation during Fischer-Tropsch over Fe-Co spinel using low Ribblet ratio syngas: A combined operando IR and kinetic study

Shashank Bahri, Shailesh Pathak, Sreedevi Upadhyayula\*

*Heterogeneous Catalysis and Reaction Engineering Laboratory, Department of Chemical Engineering,  
Indian Institute of Technology Delhi, Hauz Khas, New Delhi-110016, India*

\*E-mail address: [sreedevi@chemical.iitd.ac.in](mailto:sreedevi@chemical.iitd.ac.in)

Supporting Information

**Table S1 Parameters for external mass transfer limitations.**

| Parameter                                      | Value                   | Unit                                            |
|------------------------------------------------|-------------------------|-------------------------------------------------|
| Reaction rate of disappearance of A ( $-r_A$ ) | $2.01 \times 10^{-2}$   | $\text{mol kg}_{\text{cat}}^{-1} \text{s}^{-1}$ |
| Order of reaction ( $n$ )                      | 1                       | ---                                             |
| Mass transfer coefficient ( $k_C$ )            | $4.29 \times 10^{-2}$   | $\text{m s}^{-1}$                               |
| Bulk concentration ( $C_{AB}$ )                | 112.74                  | $\text{mol m}^{-3}$                             |
| Bulk density of catalyst bed ( $\rho_b$ )      | 546.2                   | $\text{kg}_{\text{cat}} \text{m}^{-3}$          |
| Particle radius ( $R_p$ )                      | $0.42 \times 10^{-3}$   | m                                               |
| Mears' Criterion ( $C_M$ )                     | $0.9533 \times 10^{-7}$ |                                                 |

**Table S2 Parameters for internal mass transfer limitations.**

| Parameter                                                 | Value                 | Unit                           |
|-----------------------------------------------------------|-----------------------|--------------------------------|
| Concentration of component A at the surface ( $C_{A,i}$ ) | 112.74                | $\text{mol m}^{-3}$            |
| Specific surface area ( $a_c$ )                           | $7.14 \times 10^3$    | $\text{m}_p^2 \text{m}_p^{-3}$ |
| Effective diffusivity ( $D_e$ )                           | $1.14 \times 10^{-6}$ | $\text{m}^2 \text{s}^{-1}$     |
| Weisz-Prater Criterion ( $\varphi$ )                      | $5.2 \times 10^{-3}$  |                                |

**Table S3** Experimental CO consumption rate at different reaction conditions.

| S.No. | Temp (K) | SV × 10 <sup>-2</sup> (molkg <sup>-1</sup> sec <sup>-1</sup> ) | P <sub>H2</sub> (bar) | P <sub>CO</sub> (bar) | CO conversion (%) | $r_{FT}^{exp} \times 10^{-3}$ (molkg <sup>-1</sup> sec <sup>-1</sup> ) | $r_{syngas}^{exp} \times 10^{-3}$ (molkg <sup>-1</sup> sec <sup>-1</sup> ) |
|-------|----------|----------------------------------------------------------------|-----------------------|-----------------------|-------------------|------------------------------------------------------------------------|----------------------------------------------------------------------------|
| 1     | 483      | 2.04                                                           | 6.04                  | 4.82                  | 16.90             | 1.00                                                                   | 4.09                                                                       |
| 2     | 483      | 2.27                                                           | 5.81                  | 4.70                  | 18.97             | 1.33                                                                   | 5.08                                                                       |
| 3     | 483      | 2.49                                                           | 5.72                  | 4.53                  | 21.90             | 1.61                                                                   | 5.86                                                                       |
| 4     | 483      | 2.72                                                           | 5.70                  | 4.48                  | 22.76             | 1.80                                                                   | 7.08                                                                       |
| 5     | 483      | 2.95                                                           | 5.74                  | 4.50                  | 22.41             | 2.73                                                                   | 7.76                                                                       |
| 6     | 493      | 2.04                                                           | 4.93                  | 4.02                  | 30.69             | 1.81                                                                   | 6.17                                                                       |
| 7     | 493      | 2.27                                                           | 4.81                  | 3.96                  | 31.72             | 2.31                                                                   | 7.16                                                                       |
| 8     | 493      | 2.49                                                           | 4.72                  | 3.88                  | 33.10             | 2.03                                                                   | 7.69                                                                       |
| 9     | 493      | 2.72                                                           | 4.69                  | 3.90                  | 32.76             | 2.59                                                                   | 8.85                                                                       |
| 10    | 493      | 2.95                                                           | 4.75                  | 4.04                  | 30.34             | 2.65                                                                   | 9.36                                                                       |
| 11    | 503      | 2.04                                                           | 4.20                  | 3.45                  | 40.52             | 1.65                                                                   | 6.76                                                                       |
| 12    | 503      | 2.27                                                           | 4.09                  | 3.42                  | 41.03             | 2.18                                                                   | 8.02                                                                       |
| 13    | 503      | 2.49                                                           | 4.02                  | 3.38                  | 41.72             | 3.01                                                                   | 8.55                                                                       |
| 14    | 503      | 2.72                                                           | 4.06                  | 3.46                  | 40.34             | 3.18                                                                   | 10.27                                                                      |
| 15    | 503      | 2.95                                                           | 4.15                  | 3.65                  | 37.07             | 3.22                                                                   | 10.84                                                                      |
| 16    | 513      | 2.04                                                           | 3.76                  | 3.01                  | 48.10             | 2.01                                                                   | 6.59                                                                       |
| 17    | 513      | 2.27                                                           | 3.67                  | 3.07                  | 47.07             | 2.46                                                                   | 7.90                                                                       |
| 18    | 513      | 2.49                                                           | 3.68                  | 3.08                  | 46.90             | 3.02                                                                   | 9.27                                                                       |
| 19    | 513      | 2.72                                                           | 3.70                  | 3.20                  | 44.83             | 3.55                                                                   | 10.71                                                                      |
| 20    | 513      | 2.95                                                           | 3.82                  | 3.41                  | 41.21             | 3.86                                                                   | 12.19                                                                      |

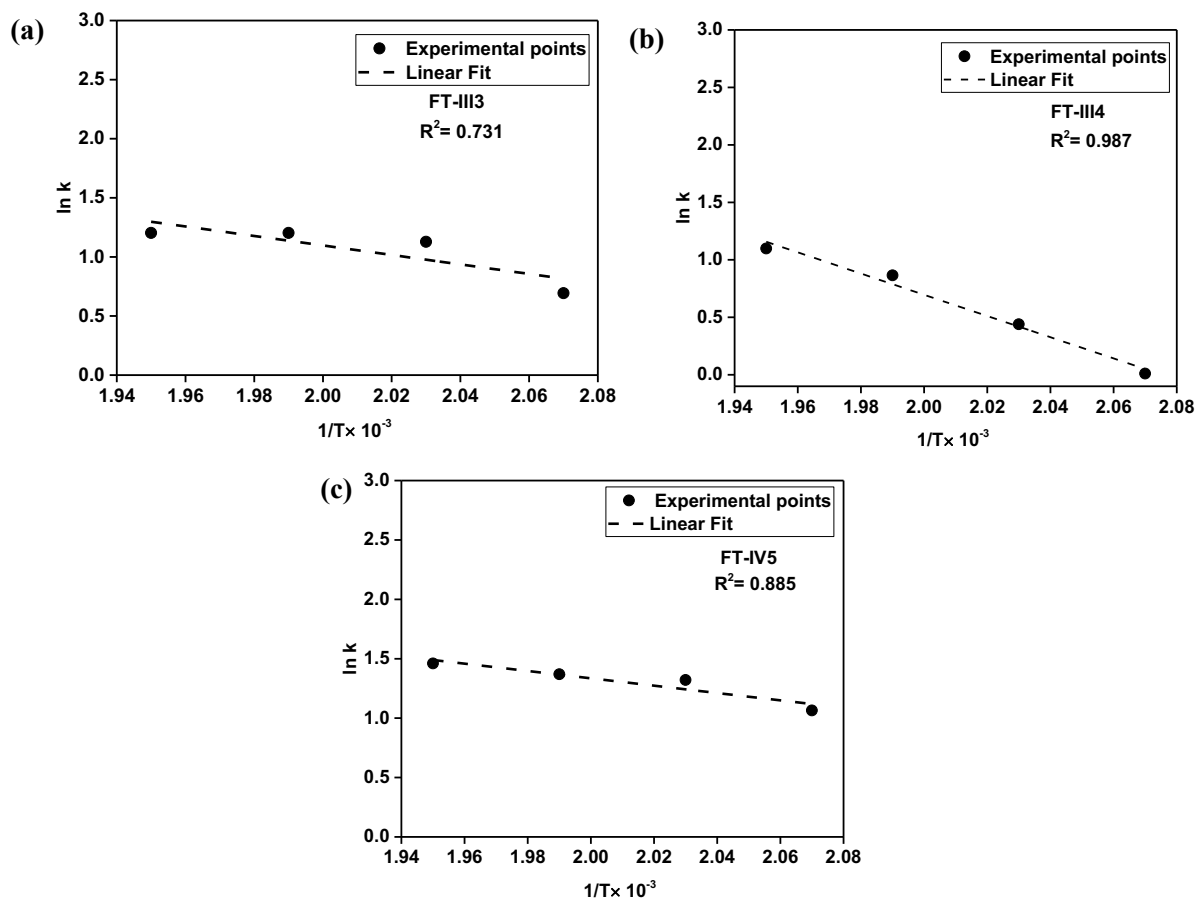

Figure S 1 Arrhenius plot of rate constants ( $k$ ) of (a) FT-III3, (b) FT-III4 and (c) FT-IV5.

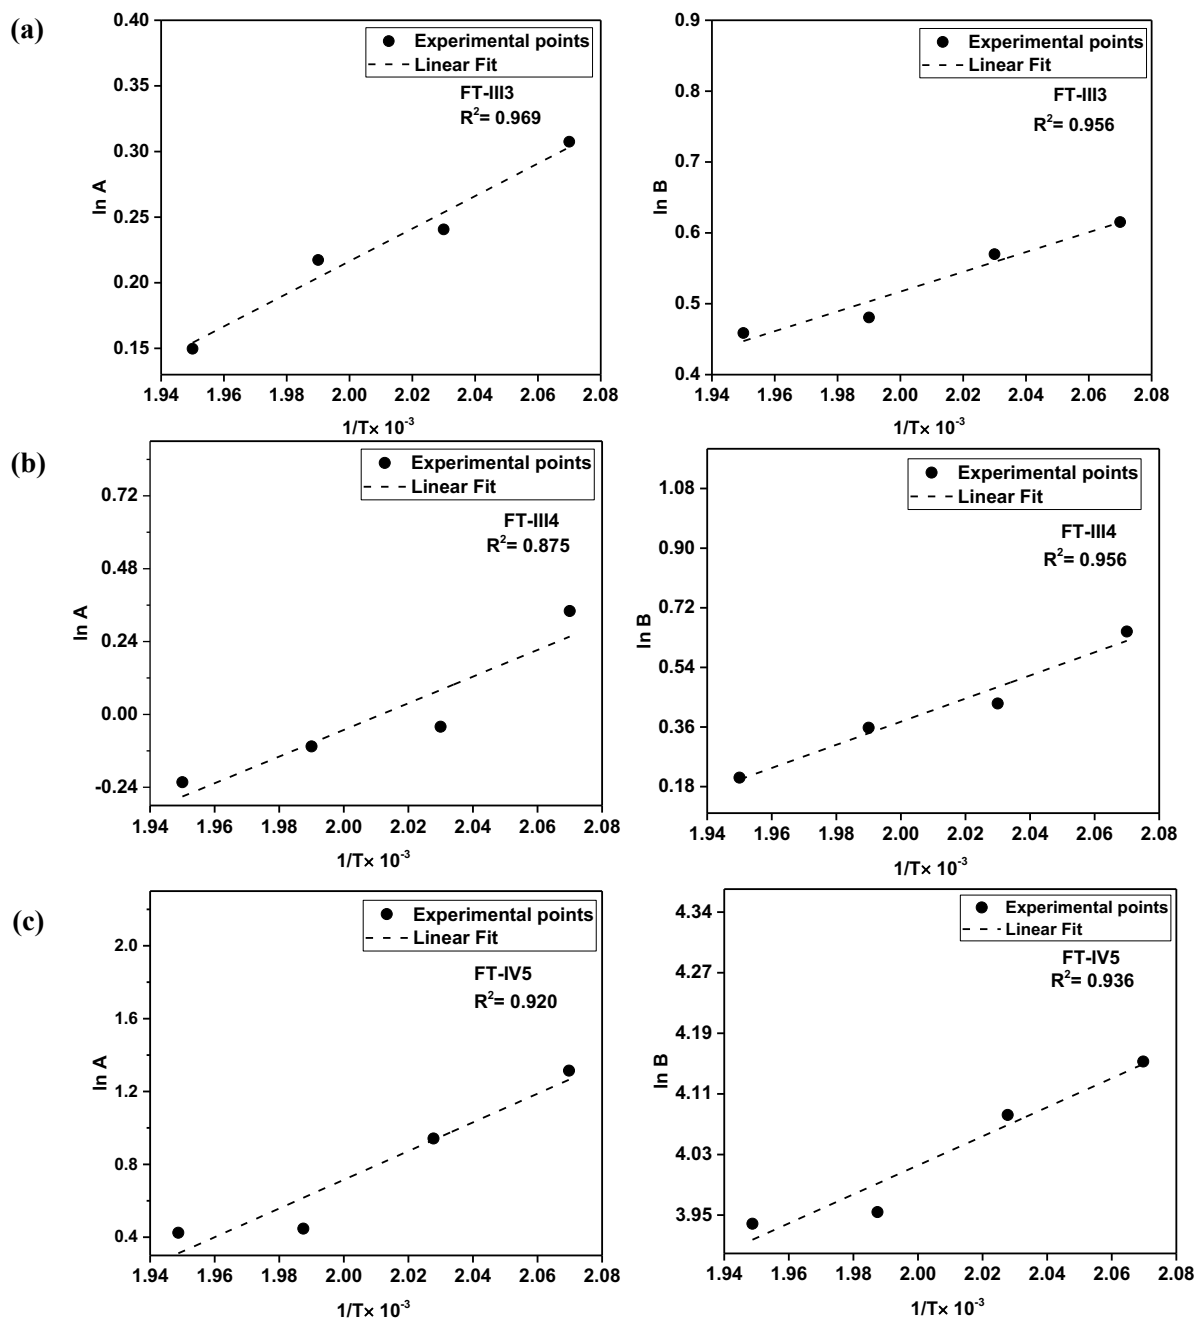

Figure S 2 Van't Hoff plot of adsorption coefficient of (A) of CO molecule and (B) of H<sub>2</sub> molecule based on the (a) FT-III3, (b) FT-III4 and (c) FT-IV-5 models.

**Table S 4 MAPD values for literature reported iron and cobalt catalyst**

| Model | Active metal | Rate Expression                                                                 | MAPD  | Ref.                                |
|-------|--------------|---------------------------------------------------------------------------------|-------|-------------------------------------|
| M1    | Co           | $r_{FT} = kP_{H_2}^2 P_{CO}$                                                    | 37.8  | (Brötz, 1949)                       |
| M2    | Fe           | $r_{FT} = \frac{kP_{H_2} P_{CO}}{bP_{H_2O} + P_{CO}}$                           | 16.6  | (Anderson et al., 1964)             |
| M3    | Fe           | $-r_{FT} = \frac{aP_{H_2}^2 P_{CO}}{1 + bP_{H_2}^2 P_{CO}}$                     | 15.9  | (Anderson et al., 1964)             |
| M4    | Fe           | $r_{FT} = \frac{kP_{H_2} P_{CO}}{bP_{H_2O} + P_{H_2} + P_{CO}}$                 | 18.5  | (Huff and Satterfield, 1984)        |
| M5    | Co           | $r_{FT} = \frac{aP_{H_2}^{0.5} P_{CO}^{0.5}}{(1 + bP_{H_2}^{0.5} + cP_{CO})^2}$ | 15.1  | (Sarup and Wojciechowski, 1989)     |
| M6    | Co           | $r_{FT} = \frac{aP_{H_2}^{0.5} P_{CO}}{(1 + bP_{CO})^2}$                        | 17.3  | (Yates and Satterfield, 1991)       |
| M7    | Co           | $r_{FT} = \frac{aP_{H_2} P_{CO}}{(1 + cP_{CO})^2}$                              | 15.9  | (Yates and Satterfield, 1991)       |
| M8    | Co           | $r_{FT} = \frac{kP_{H_2}^{0.5} P_{CO}}{bP_{H_2O} + P_{CO}}$                     | 17.8  | (van Berge, 1994)                   |
| M9    | Fe           | $r_{FT} = \frac{kP_{CO} P_{H_2}^{0.5}}{(1 + aP_{CO} + bP_{H_2O})^2}$            | 15.2  | (Van Der Laan and Beenackers, 2000) |
| M10   | Co           | $r_{FT} = \frac{aP_{H_2}^{0.74} P_{CO}}{(1 + bP_{CO})^2}$                       | 18.6  | (Zennaro et al., 2000)              |
| M11   | Fe           | $r_{FT} = \frac{aP_{H_2}^{0.75} P_{CO}^{0.5}}{(1 + bP_{CO}^{0.5})^2}$           | 15.9  | (Botes and Breman, 2006)            |
| M12   | Co           | $r_{FT} = \frac{aP_{H_2}^{0.5} P_{CO}}{(1 + bP_{H_2}^{0.5} + aP_{CO})^2}$       | 16.2  | (Bhatelia et al., 2011)             |
| M13   | Co           | $r_{FT} = \frac{kP_{CO} P_{H_2}}{(1 + bP_{CO_2} + aP_{CO}^{0.5})^2}$            | 44.58 | (Fazlollahi et al., 2012)           |
| M14   | Fe, Co       | $r_{FT} = \frac{aP_{H_2}^{0.75} P_{CO}}{(1 + aP_{CO})^2}$                       | 15.82 | (Mousavi et al., 2015)              |
| M15   | Fe-Co        | $r_{FT} = \frac{aP_{H_2}^{0.5} P_{CO}}{(1 + bP_{H_2}^{0.5} + aP_{CO})^2}$       | 16.2  | (Arsalanfar et al., 2017)           |
